# Supplementary material
Source: MDPI journal article supplement (https://www.mdpi.com/2073-4441/14/5/732)
Supplement: s1 [file s1 › water-1582959-supplementary.pdf]

# Supporting Information

## to

# Dissolved methane in coastal waters of the northeastern Black Sea

Elena S. Izhitskaya<sup>1</sup>, Alexander V. Egorov<sup>1</sup>, Alexander S. Izhitskiy<sup>1,\*</sup>, Osmar O. Möller Jr.<sup>2</sup> and Peter O. Zavialov<sup>1</sup>

<sup>1</sup> Shirshov Institute of Oceanology, Russian Academy of Sciences  
36, Nakhimovskiy prospekt, Moscow, Russia, 117997; kovaleva\_es@ocean.ru

<sup>2</sup> Instituto de Oceanografia, Universidade Federal do Rio Grande (FURG)  
CP 474, Rio Grande-RS, CEP 96201-900, Brazil

\* Correspondence: izh@ocean.ru; Tel.: +7 903 119 77 66

Supporting information contains figures illustrating dissolved methane content on the marine sections near the mouths of the Mzymta and Kudepsta rivers in 2013 and 2014. Also the document includes profiles of depth and distance from the coast on the along-shore sections in the northeastern Black Sea (2013-2015). In addition all measurements of methane concentration obtained in this study are presented.

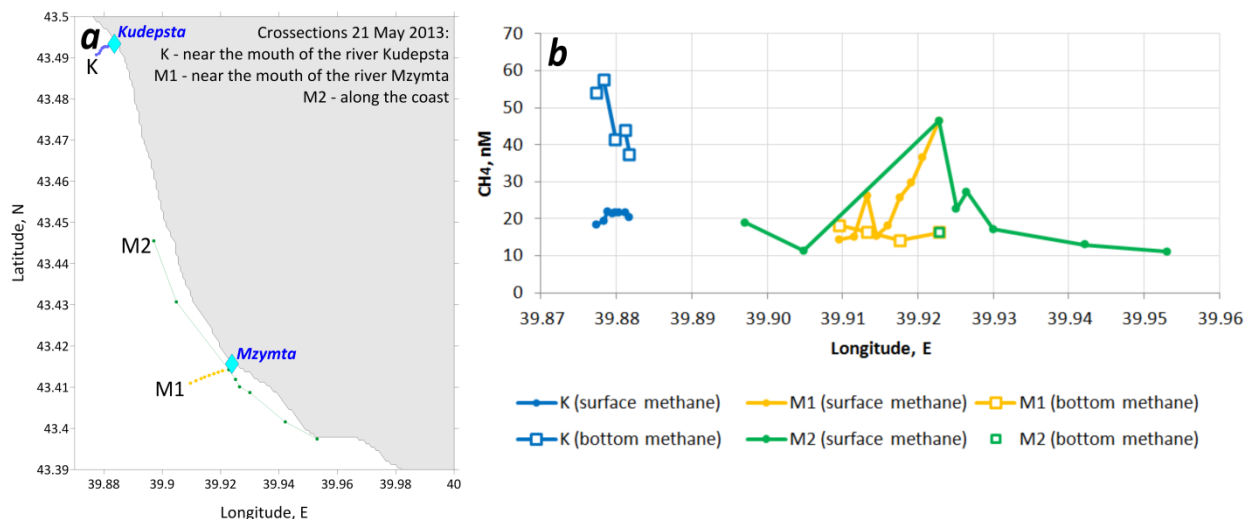

**Figure S1.** Location of water sampling stations on sections near the mouths of the Kudepsta and the Mzymta rivers, May, 2013 (a). Blue rhombi are the river mouths. The methane content in the surface and bottom waters on the sections (b).

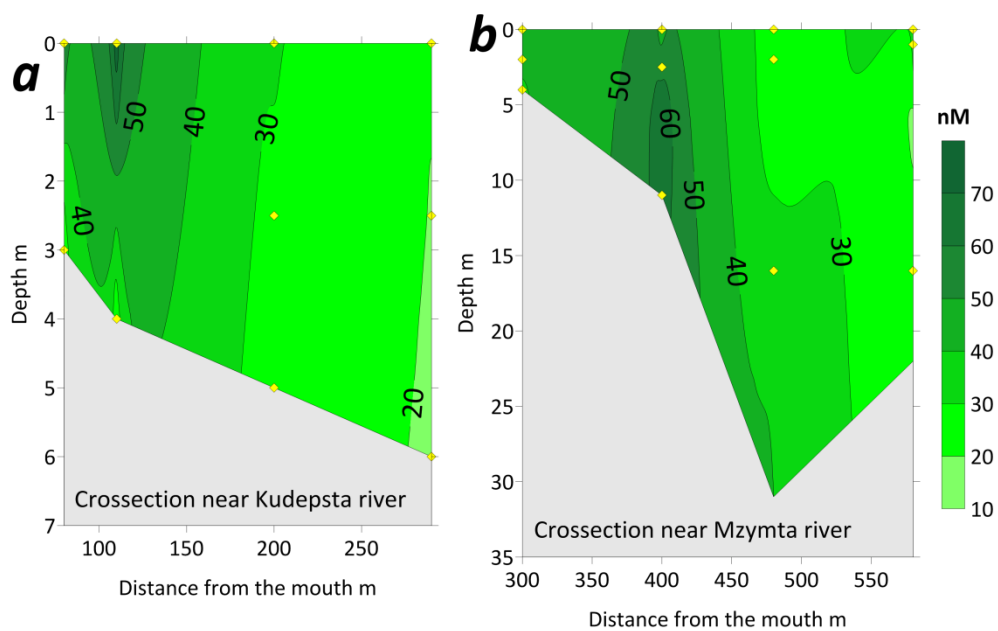

**Figure S2.** Dissolved methane content on the sections near the mouths of the rivers Kudepsta (a) and Mzymta (b), May, 2014.

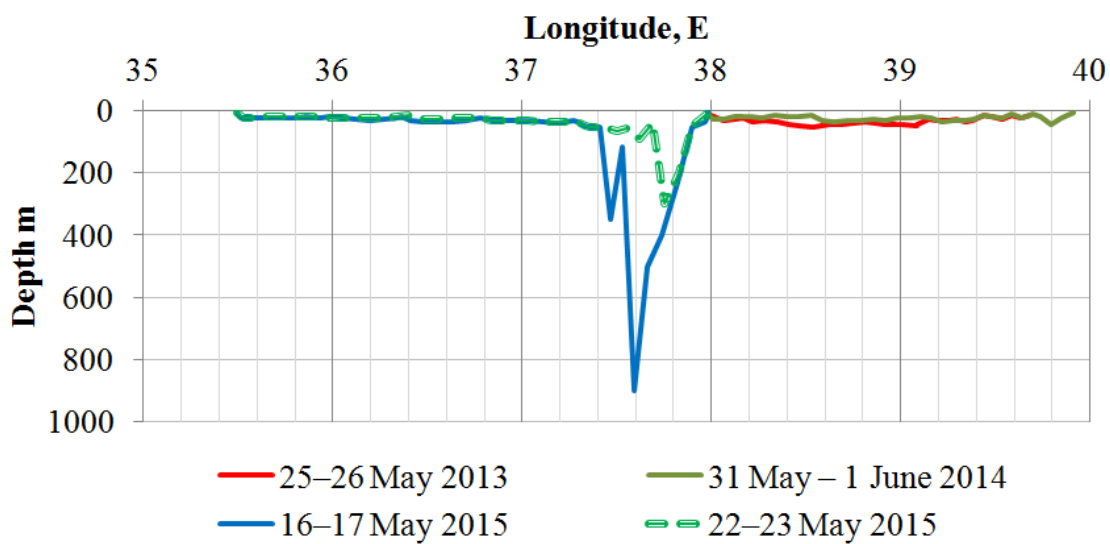

**Figure S3.** Depth on sections in the northeastern Black Sea (2013 – 2015).

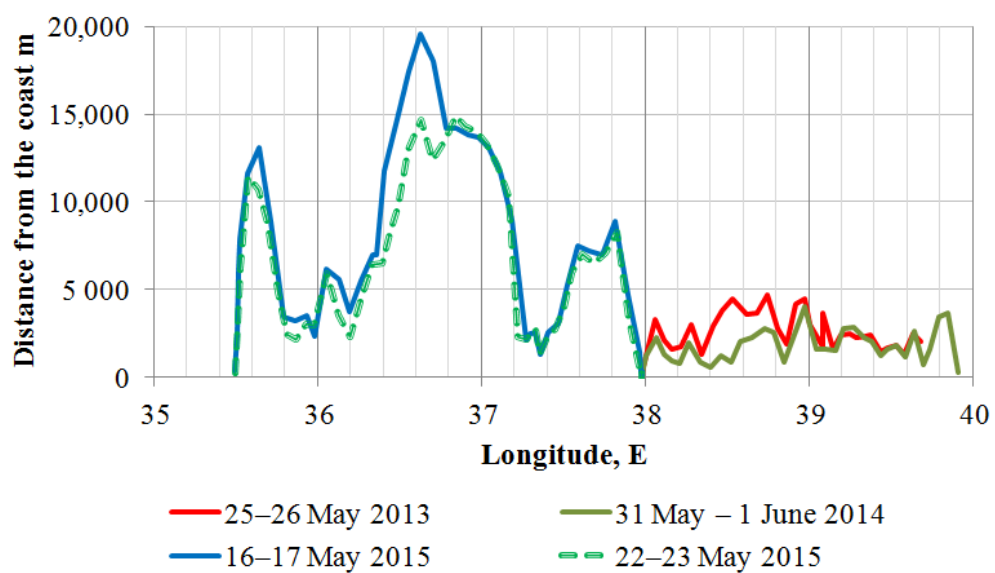

**Figure S4.** Distance from the coast on sections in the northeastern Black Sea (2013 – 2015).
